# Supplementary material for: Development and Piloting of a Web-Based Tool to Teach Relative and Absolute Risk Reductions
Source: MDPI journal article supplement (doi:10.3390/ijerph192316086), 2022-12-01
Supplement: s1 [file s1]

**Table S4. Final concept of the tool**

| Page                    | Goal                                                                                                                                                                                                        | Content                                                                                                                                                                                      | Methodical strategy                                                                                                                                         | Motivation strategies                                                                                                                                                                                                                                                                 | Material                                                       |
|-------------------------|-------------------------------------------------------------------------------------------------------------------------------------------------------------------------------------------------------------|----------------------------------------------------------------------------------------------------------------------------------------------------------------------------------------------|-------------------------------------------------------------------------------------------------------------------------------------------------------------|---------------------------------------------------------------------------------------------------------------------------------------------------------------------------------------------------------------------------------------------------------------------------------------|----------------------------------------------------------------|
| Home<br>Page (HP)       |                                                                                                                                                                                                             | <ul style="list-style-type: none"> <li>Objective and structure of the tool are explained</li> </ul>                                                                                          |                                                                                                                                                             | <ul style="list-style-type: none"> <li>Objectives of the tool are presented (C, S)</li> </ul>                                                                                                                                                                                         |                                                                |
| Problem situation (PS1) | <p>After completing the web-based tool, participants will be able to:</p> <ul style="list-style-type: none"> <li>Interpret risk reductions and describe the importance of correct interpretation</li> </ul> | <ul style="list-style-type: none"> <li>Participants are faced with the problem of choosing from two price-reduced yoghurts the product with the largest absolute price reduction.</li> </ul> | <ul style="list-style-type: none"> <li>Problem situation with an example from everyday life</li> <li>Interactive quiz followed by an explanation</li> </ul> | <ul style="list-style-type: none"> <li>Awareness for the subject through a simple, plausible everyday problem (A, R, C)</li> <li>Illustrating the problem (A)</li> <li>Positive feedback (S)</li> <li>(Unknown) gaps in knowledge are revealed through the problem. (R; C)</li> </ul> | <ul style="list-style-type: none"> <li>Illustration</li> </ul> |

(A) Attention; (R) Relevance; (C) Confidence; (S) Satisfaction

**Table S6. Continued**

| Page                    | Goal                                                                                                                              | Content                                                                                                                                                                                                                                                                                                                                           | Methodical strategy                                                                                                                                      | Motivation strategies                                                                                                                                                                                                                                                                                                                                         | Material                                                       |
|-------------------------|-----------------------------------------------------------------------------------------------------------------------------------|---------------------------------------------------------------------------------------------------------------------------------------------------------------------------------------------------------------------------------------------------------------------------------------------------------------------------------------------------|----------------------------------------------------------------------------------------------------------------------------------------------------------|---------------------------------------------------------------------------------------------------------------------------------------------------------------------------------------------------------------------------------------------------------------------------------------------------------------------------------------------------------------|----------------------------------------------------------------|
| Problem situation (PS2) | <ul style="list-style-type: none"> <li>Interpret risk reductions and describe the importance of correct interpretation</li> </ul> | <ul style="list-style-type: none"> <li>Transition from an everyday situation to a health-related situation</li> <li>Participants are asked to decide on one of two unspecified screening examinations.</li> <li>The same examination is shown with absolute and relative risk reduction.</li> <li>Solution follows after the decision.</li> </ul> | <ul style="list-style-type: none"> <li>Problem situation with a health-related reference</li> <li>Interactive quiz followed by an explanation</li> </ul> | <ul style="list-style-type: none"> <li>Transition from an everyday problem to a generally understandable medical problem (A, R)</li> <li>Working through the problem with interactive elements involving the learners; with positive feedback and solution (A; R; C)</li> <li>(Unknown) gaps in knowledge are revealed through the problem. (R; C)</li> </ul> | <ul style="list-style-type: none"> <li>Illustration</li> </ul> |

(A) Attention; (R) Relevance; (C) Confidence; (S) Satisfaction

**Table S6. Continued**

| Page                          | Goal                                                                                                                                                                             | Content                                                                                                                                                         | Methodical strategy                                                                                                                                                                                                      | Motivation strategies                                                                                                                                                                                                            | Material                                                                        |
|-------------------------------|----------------------------------------------------------------------------------------------------------------------------------------------------------------------------------|-----------------------------------------------------------------------------------------------------------------------------------------------------------------|--------------------------------------------------------------------------------------------------------------------------------------------------------------------------------------------------------------------------|----------------------------------------------------------------------------------------------------------------------------------------------------------------------------------------------------------------------------------|---------------------------------------------------------------------------------|
| Initial situation (IS)        | <ul style="list-style-type: none"> <li>Interpret risk reductions and describe the importance of correct interpretation</li> </ul>                                                | <ul style="list-style-type: none"> <li>Early detection examination is introduced as an example.</li> <li>Presentation of RCT findings</li> </ul>                | <ul style="list-style-type: none"> <li>Problem situation with health-related reference is continued.</li> <li>Pictogram shows procedure of an RCT and the event rates in the intervention and control groups.</li> </ul> | <ul style="list-style-type: none"> <li>Generally understandable medical problem with relevance for the participants (A, R)</li> <li>Illustration (A)</li> </ul>                                                                  | <ul style="list-style-type: none"> <li>Pictogram</li> </ul>                     |
| Absolute risk reduction (ARR) | <ul style="list-style-type: none"> <li>Interpret risk reductions and describe the importance of correct interpretation</li> <li>Calculate the absolute risk reduction</li> </ul> | <ul style="list-style-type: none"> <li>Calculation of the absolute risk reduction using a pictogram</li> <li>Showing the formula for the calculation</li> </ul> | <ul style="list-style-type: none"> <li>Problem situation with health-related reference is continued.</li> <li>Graphical presentation is supplemented by mathematical representation.</li> </ul>                          | <ul style="list-style-type: none"> <li>Solutions are described verbally in a simplified way and presented using mathematical formulae for different requirements of the participants (R, C)</li> <li>Illustration (A)</li> </ul> | <ul style="list-style-type: none"> <li>Pictogram</li> <li>Memory box</li> </ul> |

(A) Attention; (R) Relevance; (C) Confidence; (S) Satisfaction

**Table S6. Continued**

| Page                          | Goal                                                                                                                                                                             | Content                                                                                                                                                         | Methodical strategy                                                                                                                                                                             | Motivation strategies                                                                                                                                                                                                            | Material                                                                        |
|-------------------------------|----------------------------------------------------------------------------------------------------------------------------------------------------------------------------------|-----------------------------------------------------------------------------------------------------------------------------------------------------------------|-------------------------------------------------------------------------------------------------------------------------------------------------------------------------------------------------|----------------------------------------------------------------------------------------------------------------------------------------------------------------------------------------------------------------------------------|---------------------------------------------------------------------------------|
| Relative risk reduction (RRR) | <ul style="list-style-type: none"> <li>Interpret risk reductions and describe the importance of correct interpretation</li> <li>Calculate the relative risk reduction</li> </ul> | <ul style="list-style-type: none"> <li>Calculation of the relative risk reduction using a pictogram</li> <li>Showing the formula for the calculation</li> </ul> | <ul style="list-style-type: none"> <li>Problem situation with health-related reference is continued.</li> <li>Graphical presentation is supplemented by mathematical representation.</li> </ul> | <ul style="list-style-type: none"> <li>Solutions are described verbally in a simplified way and presented using mathematical formulae for different requirements of the participants (R, C)</li> <li>Illustration (A)</li> </ul> | <ul style="list-style-type: none"> <li>Pictogram</li> <li>Memory box</li> </ul> |

(A) Attention; (R) Relevance; (C) Confidence; (S) Satisfaction

**Table S6. Continued**

| <b>Page</b>               | <b>Goal</b>                                                                                                                            | <b>Content</b>                                                                                                                                                                                                                                       | <b>Methodical strategy</b>                                                                                                                                                                      | <b>Motivation strategies</b>                                                                                                                          | <b>Material</b>                                                                             |
|---------------------------|----------------------------------------------------------------------------------------------------------------------------------------|------------------------------------------------------------------------------------------------------------------------------------------------------------------------------------------------------------------------------------------------------|-------------------------------------------------------------------------------------------------------------------------------------------------------------------------------------------------|-------------------------------------------------------------------------------------------------------------------------------------------------------|---------------------------------------------------------------------------------------------|
| Test your knowledge (TYK) | <ul style="list-style-type: none"> <li>Calculate the absolute risk reduction</li> <li>Calculate the relative risk reduction</li> </ul> | <ul style="list-style-type: none"> <li>Checking knowledge on the calculation of absolute and relative risk reduction using an identically constructed fictitious case study.</li> </ul>                                                              | <ul style="list-style-type: none"> <li>Fictitious problem with a reference group of 100 people for easy calculation is introduced.</li> <li>Possibility for checking and correction.</li> </ul> | <ul style="list-style-type: none"> <li>Assistance can be optionally blended in (C, S)</li> <li>Possibility for checking and correction (S)</li> </ul> | <ul style="list-style-type: none"> <li>Pictogram</li> <li>Calculation dialog box</li> </ul> |
| Conclusion (C)            | <ul style="list-style-type: none"> <li>Interpret risk reductions and describe the importance of correct interpretation</li> </ul>      | <ul style="list-style-type: none"> <li>Hints for the interpretation of the risk reduction are given.</li> <li>Links to pages for more in-depth information on early detection examinations and another example on the topic of nutrition.</li> </ul> | <ul style="list-style-type: none"> <li>Summary in key words for a quick overview</li> </ul>                                                                                                     | <ul style="list-style-type: none"> <li>Translation of the imparted knowledge into short notes for use in own problem situations (R, C)</li> </ul>     | <ul style="list-style-type: none"> <li>Memory box</li> </ul>                                |

(A) Attention; (R) Relevance; (C) Confidence; (S) Satisfaction

**Table S6. Continued**

| Page               | Goal                                                                                                                                                                                                                                                                                   | Content                                                                                                                                                                                                                                                                                                                                         | Methodical strategy                                                                                                                                                                                   | Motivation strategies                                                                                                                                                           | Material                                                                                    |
|--------------------|----------------------------------------------------------------------------------------------------------------------------------------------------------------------------------------------------------------------------------------------------------------------------------------|-------------------------------------------------------------------------------------------------------------------------------------------------------------------------------------------------------------------------------------------------------------------------------------------------------------------------------------------------|-------------------------------------------------------------------------------------------------------------------------------------------------------------------------------------------------------|---------------------------------------------------------------------------------------------------------------------------------------------------------------------------------|---------------------------------------------------------------------------------------------|
| Baseline risk (BS) | <ul style="list-style-type: none"> <li>Calculate the absolute risk reduction.</li> <li>Calculate the relative risk reduction.</li> <li>Interpret the impact of the baseline risk on absolute risk reduction by comparing the absolute risks at high and low baseline risks.</li> </ul> | <ul style="list-style-type: none"> <li>Influence of the baseline risk on the absolute risk reduction using the example of statins for the prevention of a heart attack.</li> <li>Calculation of the absolute and relative risk reduction with high and low baseline risk and comparison of the absolute and relative risk reduction.</li> </ul> | <ul style="list-style-type: none"> <li>Simplifying complex problem situations.</li> <li>Change in absolute risk reduction with different baseline risk is illustrated by own calculations.</li> </ul> | <ul style="list-style-type: none"> <li>Assistance can be optionally blended in (C, S)</li> <li>Possibility for checking and correction (S)</li> <li>Illustration (A)</li> </ul> | <ul style="list-style-type: none"> <li>Pictogram</li> <li>Calculation dialog box</li> </ul> |

(A) Attention; (R) Relevance; (C) Confidence; (S) Satisfaction

**Table S6. Continued**

| Page                      | Goal                                                                                                                                                                                                                                                                                          | Content                                                                                                                                                                                                                                                                                                                                                                                           | Methodical strategy                                                                                                                                                        | Motivation strategies                                                                                                                                                                                                                                                                                   | Material                                                                                          |
|---------------------------|-----------------------------------------------------------------------------------------------------------------------------------------------------------------------------------------------------------------------------------------------------------------------------------------------|---------------------------------------------------------------------------------------------------------------------------------------------------------------------------------------------------------------------------------------------------------------------------------------------------------------------------------------------------------------------------------------------------|----------------------------------------------------------------------------------------------------------------------------------------------------------------------------|---------------------------------------------------------------------------------------------------------------------------------------------------------------------------------------------------------------------------------------------------------------------------------------------------------|---------------------------------------------------------------------------------------------------|
| Additional exercises (AE) | <ul style="list-style-type: none"> <li>Calculate the absolute risk reduction.</li> <li>Calculate the relative risk reduction.</li> <li>Analyse the relative risk reduction of a real case study by calculating the event rates and deriving the absolute risk reduction from them.</li> </ul> | <ul style="list-style-type: none"> <li>Three exercises with increasing stages of difficulty</li> <li>Exercise 1: Different group sizes and calculation of the event rates</li> <li>Exercise 2: Presentation in a table and introduction of the terms intervention group and control group.</li> <li>Exercise 3: Calculation of the absolute risk reduction based on a real case study.</li> </ul> | <ul style="list-style-type: none"> <li>Difficulty of the exercises is increased stepwise</li> <li>Difficulties of the exercises are described in the selection.</li> </ul> | <ul style="list-style-type: none"> <li>Exercise with a real example (A, R)</li> <li>Assistance can be optionally blended in (C, S)</li> <li>Possibility for checking and correction (S)</li> <li>The difficulty level is recognizable for the participants. (C, S)</li> <li>Illustration (A)</li> </ul> | <ul style="list-style-type: none"> <li>Real case study</li> <li>Calculation dialog box</li> </ul> |

(A) Attention; (R) Relevance; (C) Confidence; (S) Satisfaction
