# Supplementary material for: Development and Piloting of a Web-Based Tool to Teach Relative and Absolute Risk Reductions
Source: MDPI journal article supplement (doi:10.3390/ijerph192316086), 2022-12-01
Supplement: s1 [file s1]

**Table S2. Identified educational interventions through the systematic literature review and internet search**

| Author (Year)/Titel                                                                                                                                                   | Source             | Link                                                                                                                                                                                                                |
|-----------------------------------------------------------------------------------------------------------------------------------------------------------------------|--------------------|---------------------------------------------------------------------------------------------------------------------------------------------------------------------------------------------------------------------|
| <b>Anger &amp; Steilmann, (2016)</b><br>Entwicklung und Pilotierung einer audiovisuellen Patienteninformation zur Risikoreduktion für Menschen mit Multipler Sklerose | Literature review  |                                                                                                                                                                                                                     |
| <b>Coppus et al., EU-EBM Projekt (2007)</b><br>A clinically integrated curriculum in evidence-based medicine for just-in-time learning through on-the-job training    | Literature review  |                                                                                                                                                                                                                     |
| <b>Ilic et al., (2013)</b><br>Adopting a blended learning approach to teaching evidence based medicine: A mixed methods study                                         | Literature review  |                                                                                                                                                                                                                     |
| <b>Attia, (2018)</b><br>Studying Studies: Part I – relative risk vs. absolute risk                                                                                    | Google             | <a href="https://peterattiamd.com/ns001/">https://peterattiamd.com/ns001/</a>                                                                                                                                       |
| <b>Barratt et al., (2004)</b><br>Tips for learners of evidence-based medicine: 1. Relative risk reduction, absolute risk reduction and number needed to treat         | Google             | <a href="http://www.cmaj.ca/content/171/4/353.full">http://www.cmaj.ca/content/171/4/353.full</a>                                                                                                                   |
| <b>Breastcancer.org, (2019)</b><br>Examples of Risk Increasing and Decreasing                                                                                         | Google             | <a href="https://www.breastcancer.org/risk/understand/examples">https://www.breastcancer.org/risk/understand/examples</a>                                                                                           |
| <b>Buckingham, Fisher, &amp; Saunders, (2008)</b><br>Statistical Calculations Interpreting the Importance and Precision of Therapeutic Results                        | Google             | <a href="http://www.ebm.med.ualberta.ca/TherapyCalc.html">http://www.ebm.med.ualberta.ca/TherapyCalc.html</a>                                                                                                       |
| <b>Cates, (2005)</b><br>Understanding statistics 1: presenting data from clinical trials                                                                              | Google             | <a href="https://learning.bmj.com/learning/module-intro/understanding-statistics.html?moduleId=5003158">https://learning.bmj.com/learning/module-intro/understanding-statistics.html?moduleId=5003158</a>           |
| <b>Gnadt &amp; Dircks, (2016)</b><br>OR, RR, NNT<br>Grundlagen der medizinischen Statistik: Klinische Studien und ihre Bewertung, Teil 3                              | Google             | <a href="https://www.deutsche-apotheker-zeitung.de/daz-az/2016/daz-5-2016/or-rr-nnt">https://www.deutsche-apotheker-zeitung.de/daz-az/2016/daz-5-2016/or-rr-nnt</a>                                                 |
| <b>HealthNewsReview.org, (2019)</b><br>Reporting the findings: Absolute vs. relative risk.                                                                            | Testing Treatments | <a href="https://www.healthnewsreview.org/toolkit/tips-for-understanding-studies/absolute-vs-relative-risk/">https://www.healthnewsreview.org/toolkit/tips-for-understanding-studies/absolute-vs-relative-risk/</a> |

**Table S4. Continued**

|                                                                                                                                           |                                                     |                                                                                                                                                                                                                                                                                                                                           |
|-------------------------------------------------------------------------------------------------------------------------------------------|-----------------------------------------------------|-------------------------------------------------------------------------------------------------------------------------------------------------------------------------------------------------------------------------------------------------------------------------------------------------------------------------------------------|
| <b>medistat, (2019)</b><br>Absolute und relative Risikoreduktion                                                                          | Google                                              | <a href="https://www.medistat.de/glossar/analyse-von-haeufigkeiten/relative-risikoreduktion/">https://www.medistat.de/glossar/analyse-von-haeufigkeiten/relative-risikoreduktion/</a>                                                                                                                                                     |
| <b>Molina, (2018)</b><br>King of Kings                                                                                                    | Google                                              | <a href="https://www.cienciasinseso.com/en/tag/relative-risk-reduction/">https://www.cienciasinseso.com/en/tag/relative-risk-reduction/</a>                                                                                                                                                                                               |
| <b>National Breast Cancer Coalition, (2013)</b><br>Understanding Absolute Risk Reduction Versus Relative Risk Reduction                   | Google                                              | <a href="http://www.breastcancerdeadline2020.org/breast-cancer-information/quality-care-guide/choice/making-decisions-about-your-care/understanding-absolute-risk.html">http://www.breastcancerdeadline2020.org/breast-cancer-information/quality-care-guide/choice/making-decisions-about-your-care/understanding-absolute-risk.html</a> |
| <b>National Collaborating Centre for Methods and Tools, (2019)</b><br>What's the Risk? Understanding Absolute and Relative Risk Reduction | National Collaborating Centre for Methods and Tools | <a href="https://www.nccmt.ca/capacity-development/videos?v=548#ure1">https://www.nccmt.ca/capacity-development/videos?v=548#ure1</a>                                                                                                                                                                                                     |
| <b>Neye, (2004)</b><br>Wie gross ist der wirkliche Nutzen für Patienten?                                                                  | Google                                              | <a href="https://www.pharmazeutische-zeitung.de/inhalt-09-2004/pharm3-09-2004/">https://www.pharmazeutische-zeitung.de/inhalt-09-2004/pharm3-09-2004/</a>                                                                                                                                                                                 |
| <b>O'Rourke, (1998)</b><br>Relative Risk and Absolute Risk Interpretation                                                                 | Google                                              | <a href="http://www.uvm.edu/~dhowell/gadstat/psych340/Labs/risk.html#RRR">http://www.uvm.edu/~dhowell/gadstat/psych340/Labs/risk.html#RRR</a>                                                                                                                                                                                             |
| <b>Public Health Action Support Team, (2017)</b><br>Summarising binary data                                                               | National Collaborating Centre for Methods and Tools | <a href="https://www.healthknowledge.org.uk/e-learning/statistical-methods/practitioners/summarising-binary-data">https://www.healthknowledge.org.uk/e-learning/statistical-methods/practitioners/summarising-binary-data</a>                                                                                                             |
| <b>Sambunjak D, Cumpston M, Watts C., (2017)</b><br>Module 6: Analysing the data                                                          | National Collaborating Centre for Methods and Tools | <a href="https://training.cochrane.org/interactivelearning/module-6-analysing-data">https://training.cochrane.org/interactivelearning/module-6-analysing-data</a>                                                                                                                                                                         |
| <b>Tape, (not specified)</b><br>Measures of Effect Size of an Intervention                                                                | Google                                              | <a href="http://gim.unmc.edu/dxtests/effect1.htm">http://gim.unmc.edu/dxtests/effect1.htm</a>                                                                                                                                                                                                                                             |
| <b>Therapeutics Initiative, (1996)</b><br>Evidence Based Drug Therapy<br>What Do the Numbers Mean?                                        | Google                                              | <a href="https://www.ti.ubc.ca/pages/letter15.htm">https://www.ti.ubc.ca/pages/letter15.htm</a>                                                                                                                                                                                                                                           |
| <b>Universität Hamburg, (2018)</b><br>Risikoreduktion<br>Risikoreduktion besser einschätzen                                               | Google                                              | <a href="https://www.gesundheit.uni-hamburg.de/wissen/grundwissen/risikoreduktion.html">https://www.gesundheit.uni-hamburg.de/wissen/grundwissen/risikoreduktion.html</a>                                                                                                                                                                 |
| <b>University of Massachusetts Medical School, (not specified)</b><br>Relative risk, absolute risk and number-needed-to-treat             | Testing Treatments                                  | <a href="https://onlinetraining.umassmed.edu/ay1213011">https://onlinetraining.umassmed.edu/ay1213011</a>                                                                                                                                                                                                                                 |
