# Supplementary material for: Development and Piloting of a Web-Based Tool to Teach Relative and Absolute Risk Reductions
Source: MDPI journal article supplement (doi:10.3390/ijerph192316086), 2022-12-01
Supplement: s1 [file s1]

**Table S3. Category system**

| Main category                                                                                                                                                                                                                             | Subcategory                 | Definition                                                                                                                                                    | Anchor example                                                                                                                  |
|-------------------------------------------------------------------------------------------------------------------------------------------------------------------------------------------------------------------------------------------|-----------------------------|---------------------------------------------------------------------------------------------------------------------------------------------------------------|---------------------------------------------------------------------------------------------------------------------------------|
| <b>1. Acceptance</b><br><br>Acceptance includes the satisfaction of all participants with the tool as well as the emotional reactions and all statement concerning the relevance and hypothetical benefit and recommendation of the tool. | 1.1 Satisfaction            | All text passages are included from which a statement concerning the satisfaction of the participants with the tool can be derived.                           | <i>“Yes, no it’s nice to be a little more based in one’s assessment.”</i>                                                       |
|                                                                                                                                                                                                                                           | 1.2 Emotional reaction      | All text passages are included from which a statement from the participants can be derived concerning a reaction such as pleasure, anger or fear, for example | <i>“And when I read this through, it’s always impressive how blinded one actually becomes about some things.”</i>               |
|                                                                                                                                                                                                                                           | 1.3 Relevance               | All text passages are included in which the participants mention something about the relevance of the content and/or the practical application of the tool.   | <i>“I do think that it is very relevant having to think about just how such events should be interpreted.”</i>                  |
|                                                                                                                                                                                                                                           | 1.4 Benefit/ Recommendation | All text passages are included in which the participants address the hypothetical benefit or recommendation to acquaintances, relatives or colleagues.        | <i>“I really would recommend the tool to others so that more people deal with these issues.”</i>                                |
| <b>2. Applicability</b><br><br>Applicability includes statements concerning structure, handling and design of the tool                                                                                                                    | 2.1 Structure               | All text passages are included that mention the structure, composition and order of the tool’s content.                                                       | <i>“Nicely structured and not so much kitsch, but really well structured and clear</i>                                          |
|                                                                                                                                                                                                                                           | 2.2 Handling                | All text passages are included that refer to the handling of the individual interactive elements of the tool and its navigation.                              | <i>“It’s well known that there are further explanations to be found if you click on an underlined text passage.”</i>            |
|                                                                                                                                                                                                                                           | 2.3 Design                  | All text passages are included that refer to the design of the tool and its individual components, such as graphics, for instance.                            | <i>“Yes, as I said about the question marks. For me, it was always the case that I didn’t take it all that seriously [...]”</i> |

**Table S5. Continued**

| <b>Main category</b>                                                                                                                                                                                                                                | <b>Subcategory</b>               | <b>Definition</b>                                                                                                                                 | <b>Anchor example</b>                                                                                                      |
|-----------------------------------------------------------------------------------------------------------------------------------------------------------------------------------------------------------------------------------------------------|----------------------------------|---------------------------------------------------------------------------------------------------------------------------------------------------|----------------------------------------------------------------------------------------------------------------------------|
| <p>3. Comprehension</p> <p>Comprehension includes statements concerning comprehension and perspectives of comprehensibility as a prerequisite for comprehension as well as statements about the difficulty of the test questions and exercises.</p> | 3.1 Comprehension of the content | All text passages are included in which it becomes clear how the participants can understand the contents.                                        | <i>“What this means isn’t clear to me at the moment. No, I don’t understand it.”</i>                                       |
|                                                                                                                                                                                                                                                     | 3.2 Difficulty of the exercises  | All passages are included that describe the perceived degree of difficulty of the exercises and test questions, including the task itself.        | <i>“Yes, it can be solved. I would have to concentrate properly and pull myself together by entering the right thing.”</i> |
|                                                                                                                                                                                                                                                     | 3.3 Text difficulties*           | All passages are included in which statements about the readability, difficulty and understanding of a text passage are mentioned.                | <i>“I think it is explained rather complicatedly. You have to read it several times in order to understand it.”</i>        |
|                                                                                                                                                                                                                                                     | 3.4 Transferability*             | All passages are included that refer to the ability to apply what has been learned in practice and to be able to transfer it to other situations. | <i>“Yes, but I’m sure I can’t implement it yet.”</i>                                                                       |
| 4. Achievement of didactic objectives*                                                                                                                                                                                                              |                                  | All text passages are included that allow conclusions to be drawn about the success or failure of the didactic strategy.                          | <i>“Well, it’s supposed to draw my attention to the fact that I’m probably wrong and that’s why I think it’s good.”</i>    |

\* Inductively created categories
