# Supplementary material for: Development and Piloting of a Web-Based Tool to Teach Relative and Absolute Risk Reductions
Source: Int J Environ Res Public Health. 2022 Dec 1;19(23):16086. doi: 10.3390/ijerph192316086 (PMC9739880; doi:10.3390/ijerph192316086)
Supplement: Supplementary file 1 [file ijerph-19-16086-s001.zip]

Archive with 6 entries (6 files):
- Figure S1. Flow chart for the Internet search.pdf
- Figure S2. Flow chart for the systematic literature search.pdf
- Table S1. Description of the systematic search strategy.pdf
- Table S2. Identified educational interventions through the systematic literature review and internet search.pdf
- Table S3. Category system.pdf
- Table S4. Final concept of the tool.pdf
