# Supplementary figures and images for: Development and Piloting of a Web-Based Tool to Teach Relative and Absolute Risk Reductions
Source: MDPI journal article supplement (doi:10.3390/ijerph192316086), 2022-12-01

**Figure S2. Flow chart for the systematic literature search**

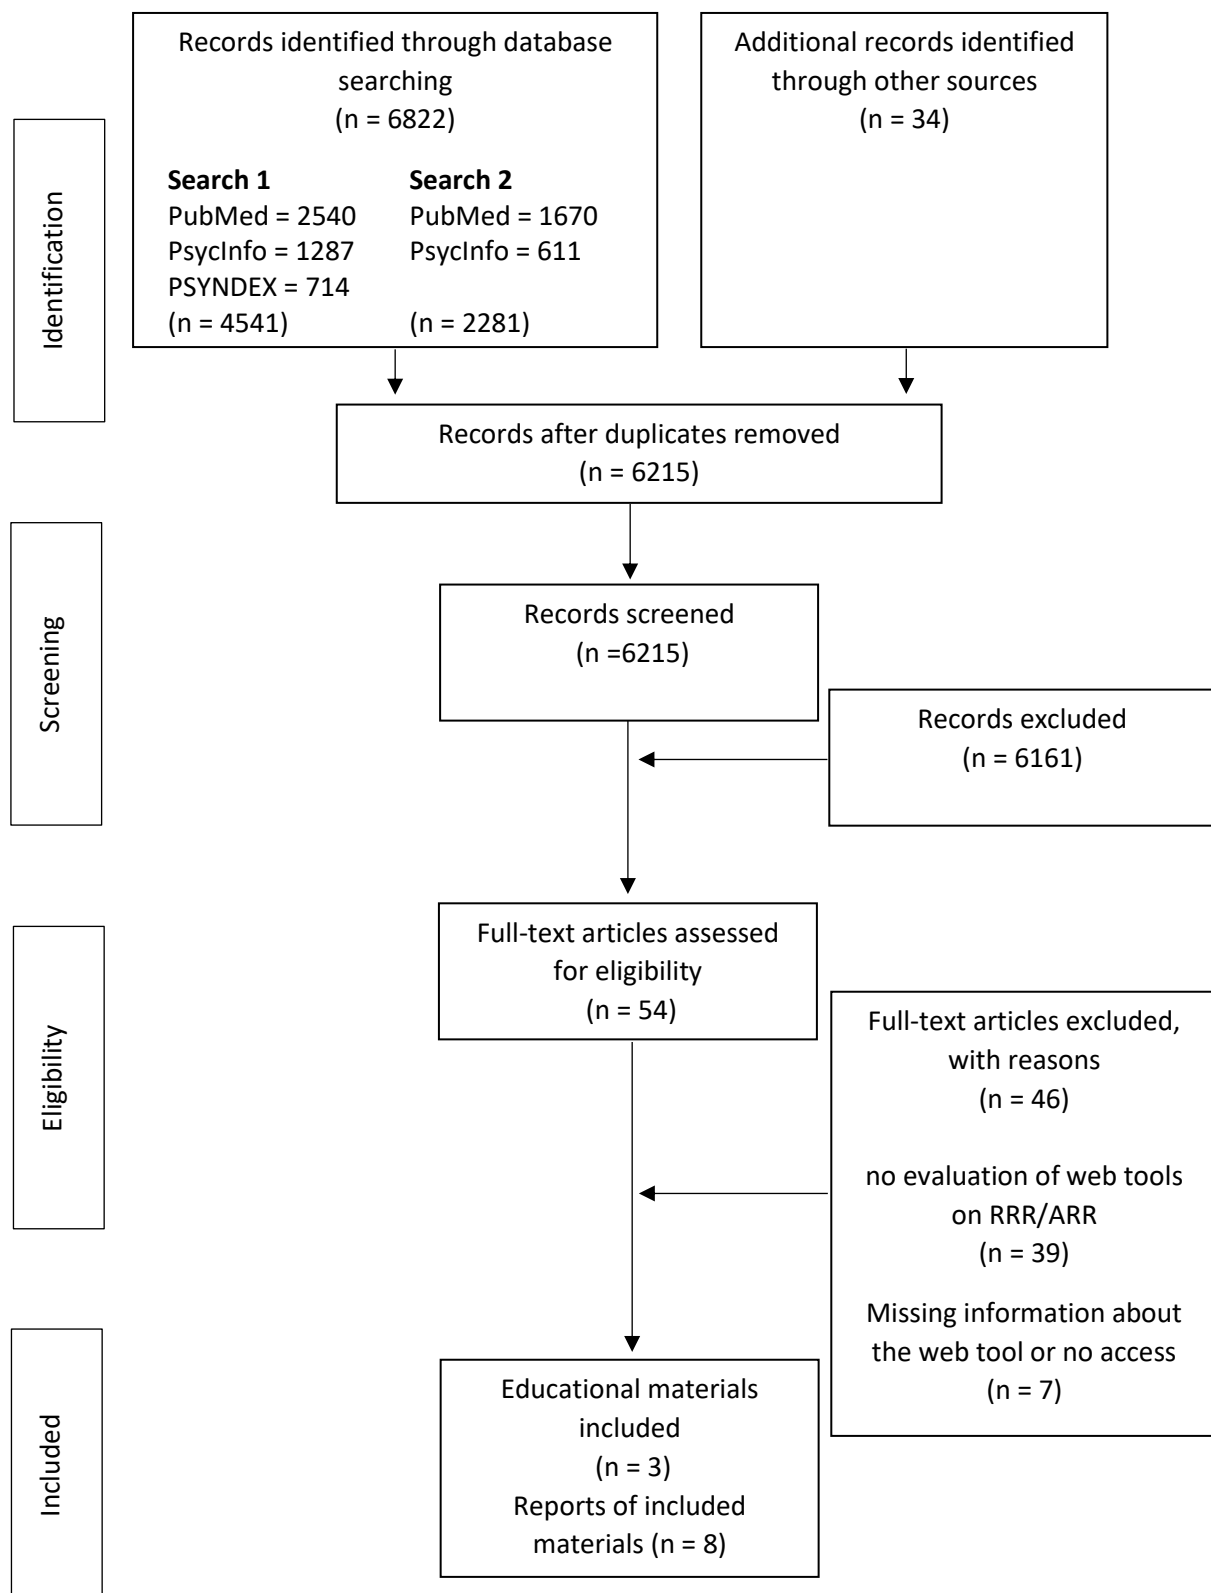

Supplement: s1 [file s1]

**Figure S1. Flow chart for the Internet search**

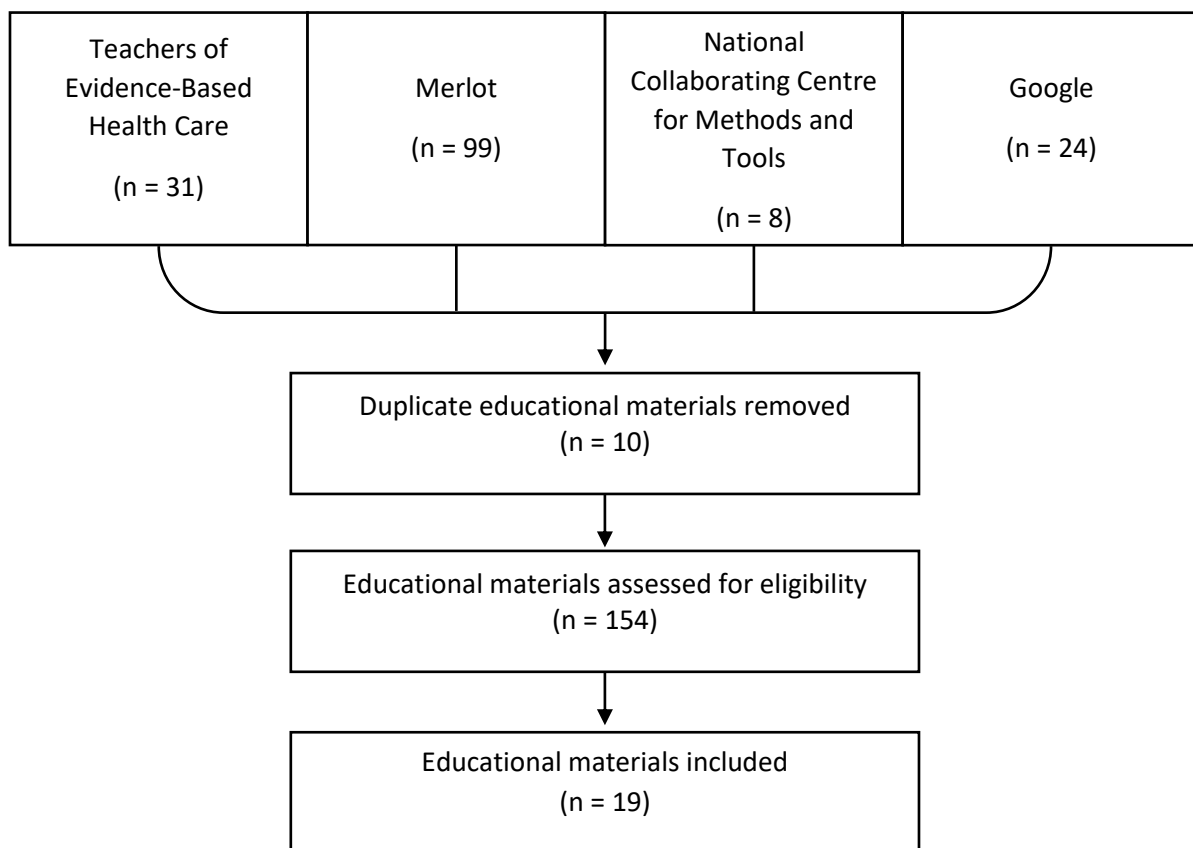

Supplement: s1 [file s1]
